# Supplementary material for: Discovery of a pyrrole-pyridinimidazole derivative as novel SIRT6 inhibitor for sensitizing pancreatic cancer to gemcitabine
Source: PubMed Central journal article supplement (PMC10403574; doi:10.1038/s41419-023-06018-1), 2023-08-04

# 1. Figure 1

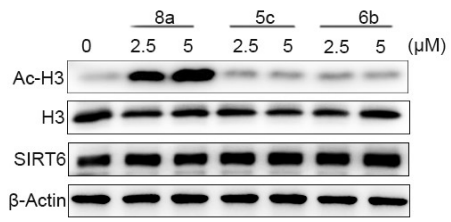

Ac-H3

H3

SIRT6

$\beta$ -Actin

## 2 . Figure 2

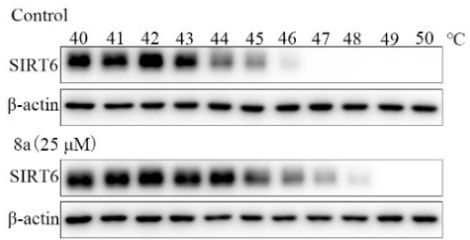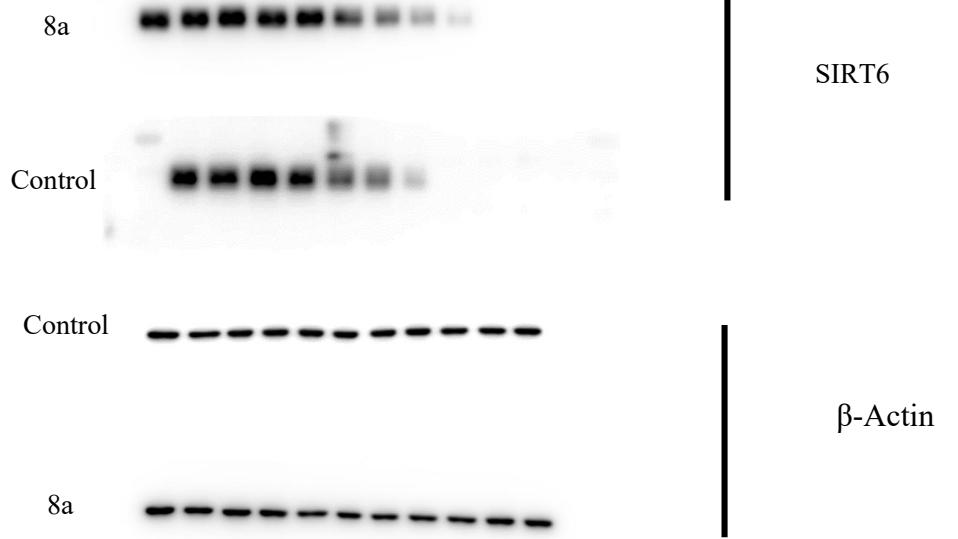

### 3. Figure 3a

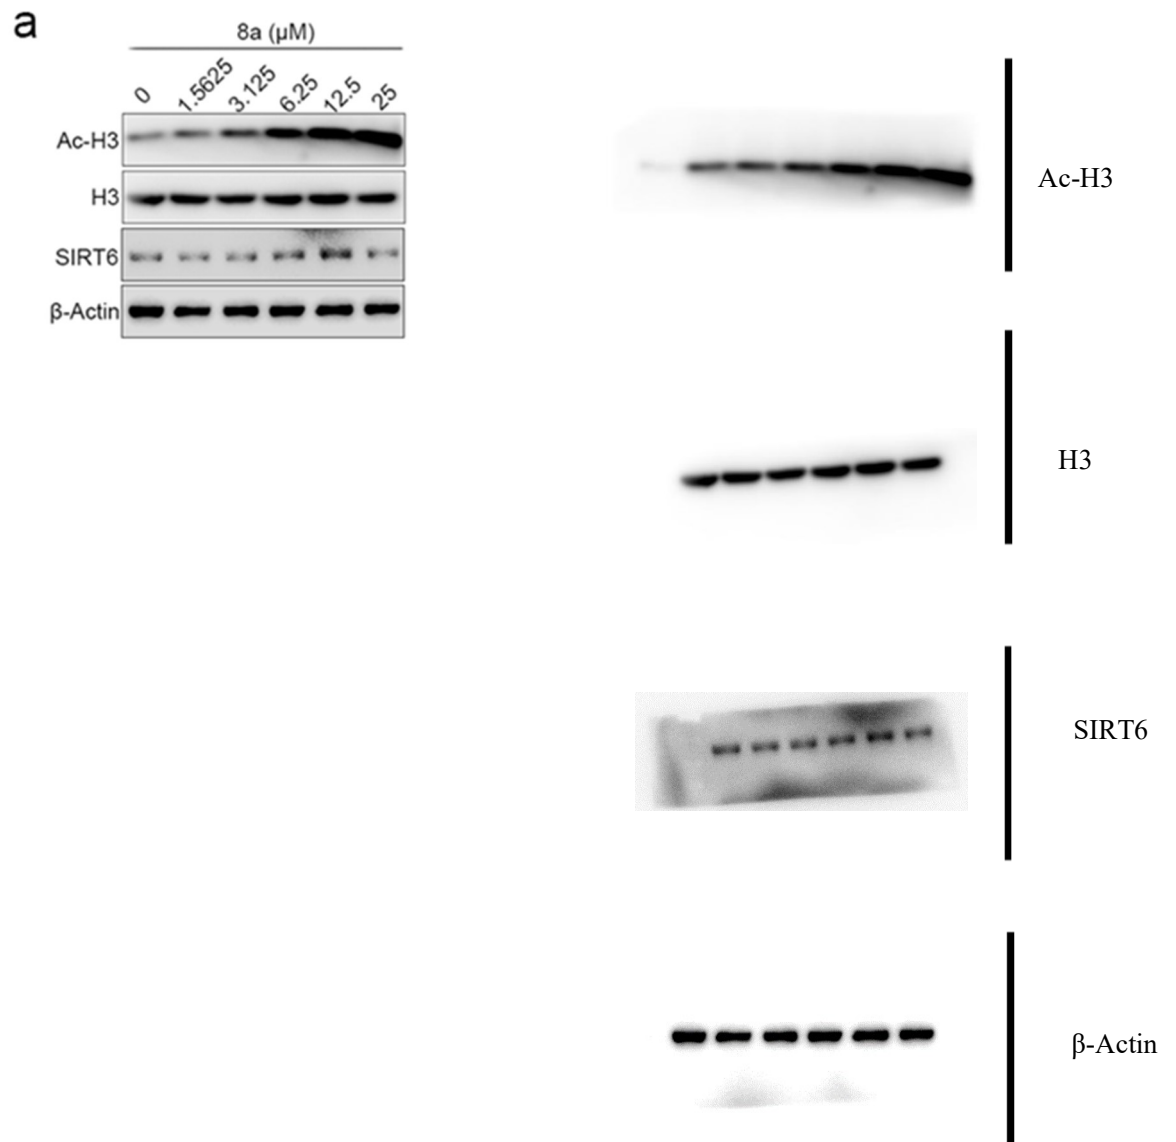

#### 4. Figure 3d

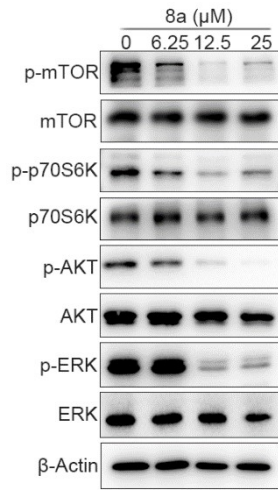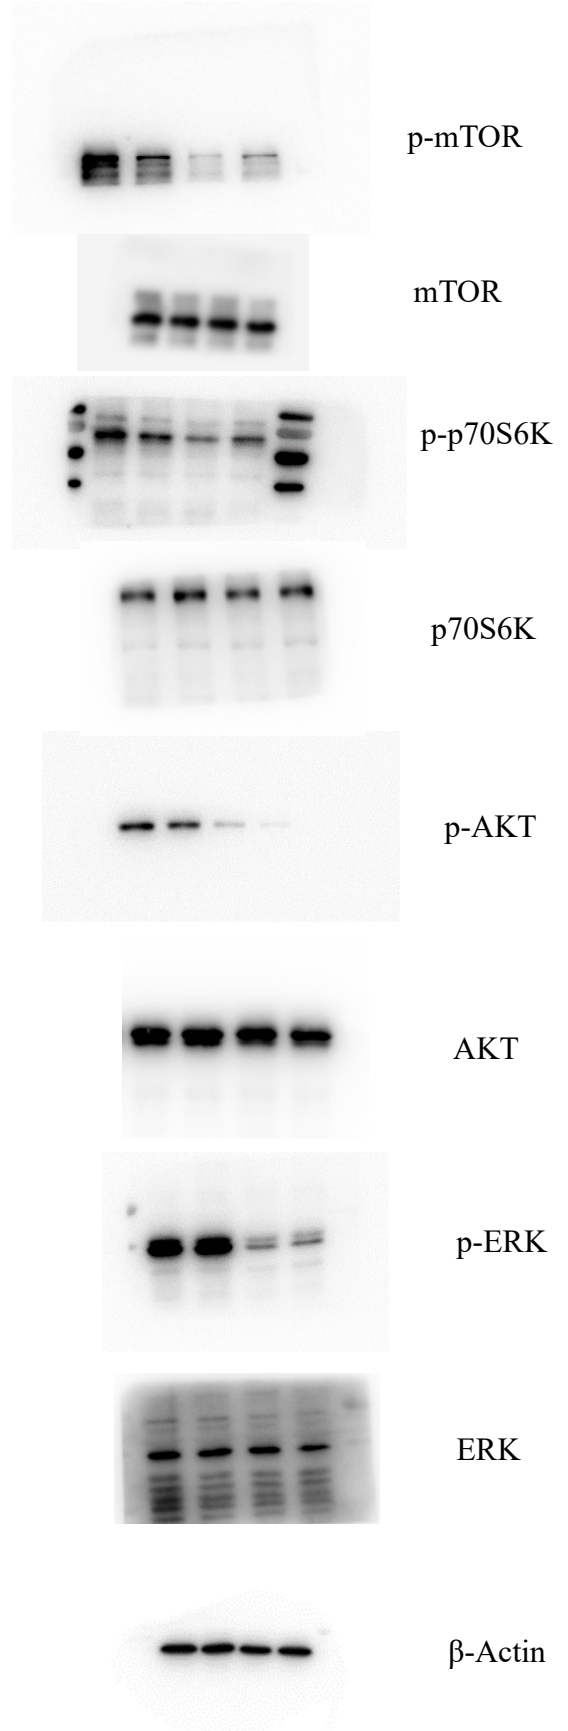

5. Figure 3g

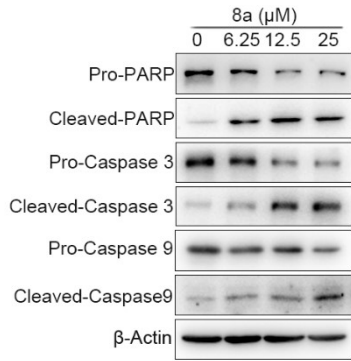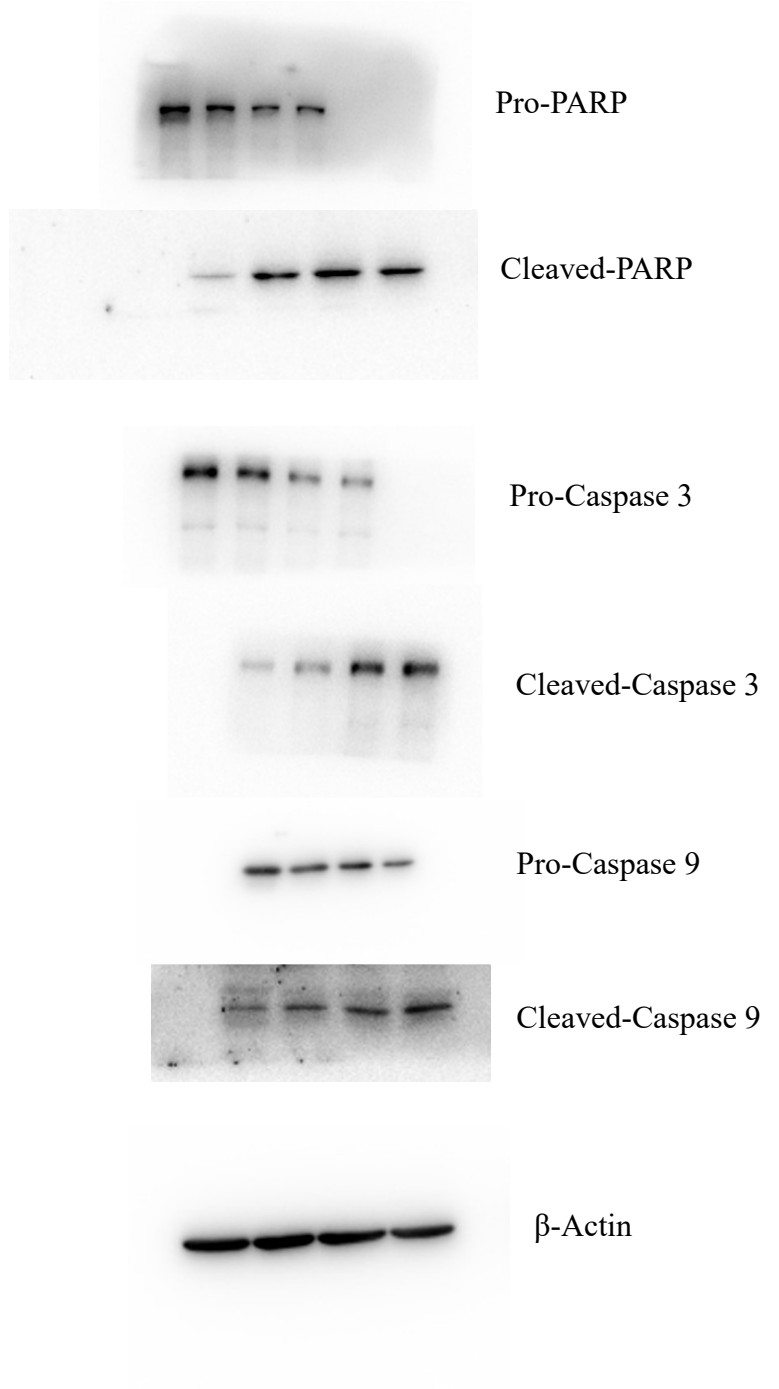

**6. Figure 4e**

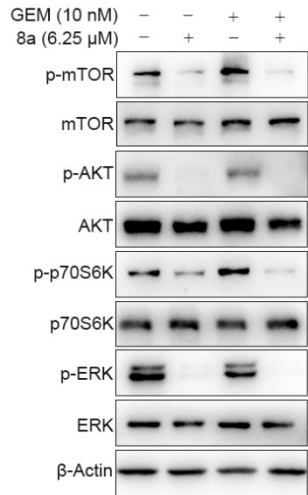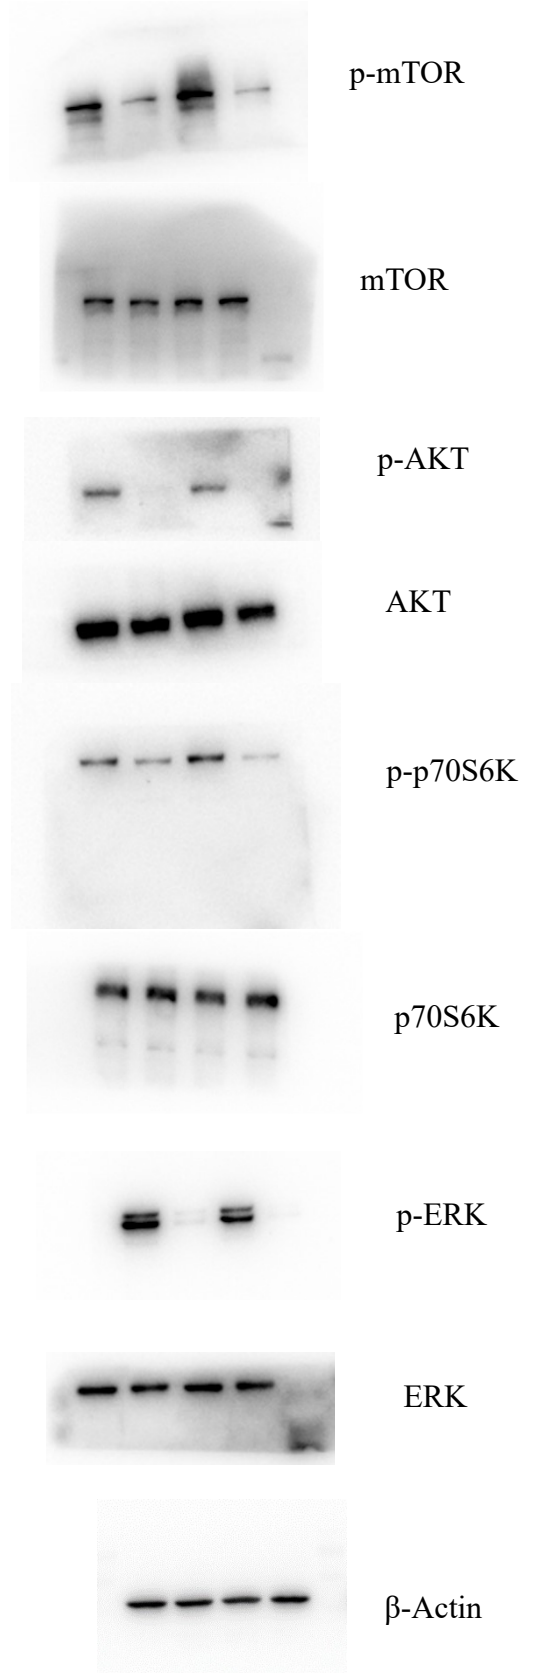

## 7. Figure 4g

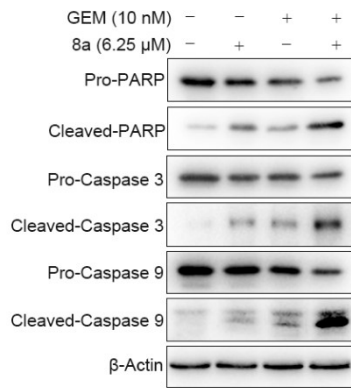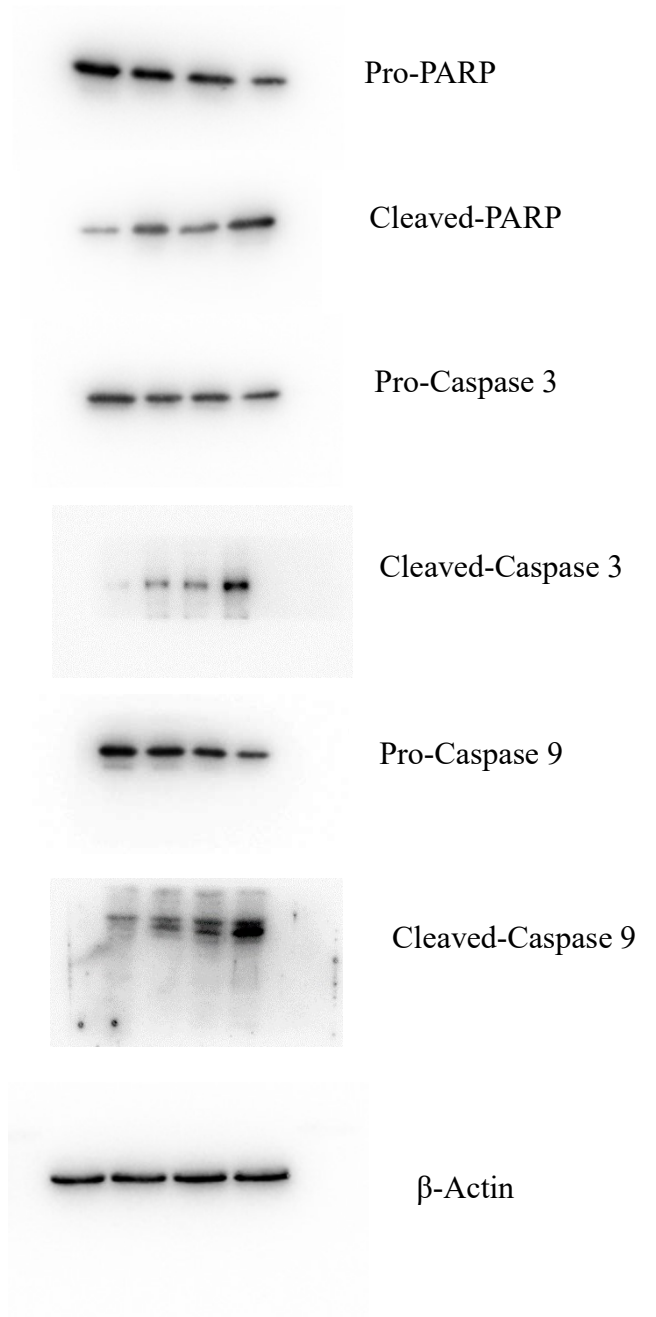

## 8. Figure 5d

|                   |   |   |   |   |   |   |   |   |
|-------------------|---|---|---|---|---|---|---|---|
| 8a (6.25 $\mu$ M) | - | + | - | - | - | - | - | - |
| 8a (12.5 $\mu$ M) | - | - | + | - | - | - | + | + |
| 8a (25 $\mu$ M)   | - | - | - | + | - | - | - | - |
| GEM (10 nM)       | - | - | - | - | + | - | + | - |
| GEM (100 nM)      | - | - | - | - | - | + | - | + |
| $\gamma$ -H2AX    |   |   |   |   |   |   |   |   |
| $\beta$ -Actin    |   |   |   |   |   |   |   |   |

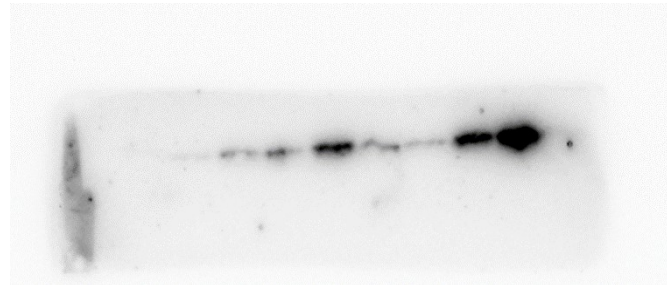

$\gamma$ -H2AX

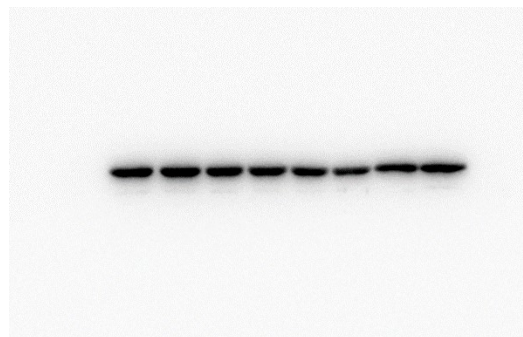

$\beta$ -Actin



## 9. Figure S3

a

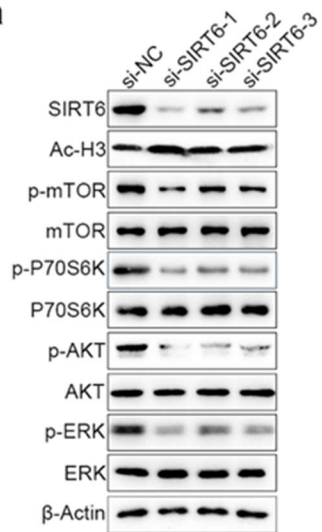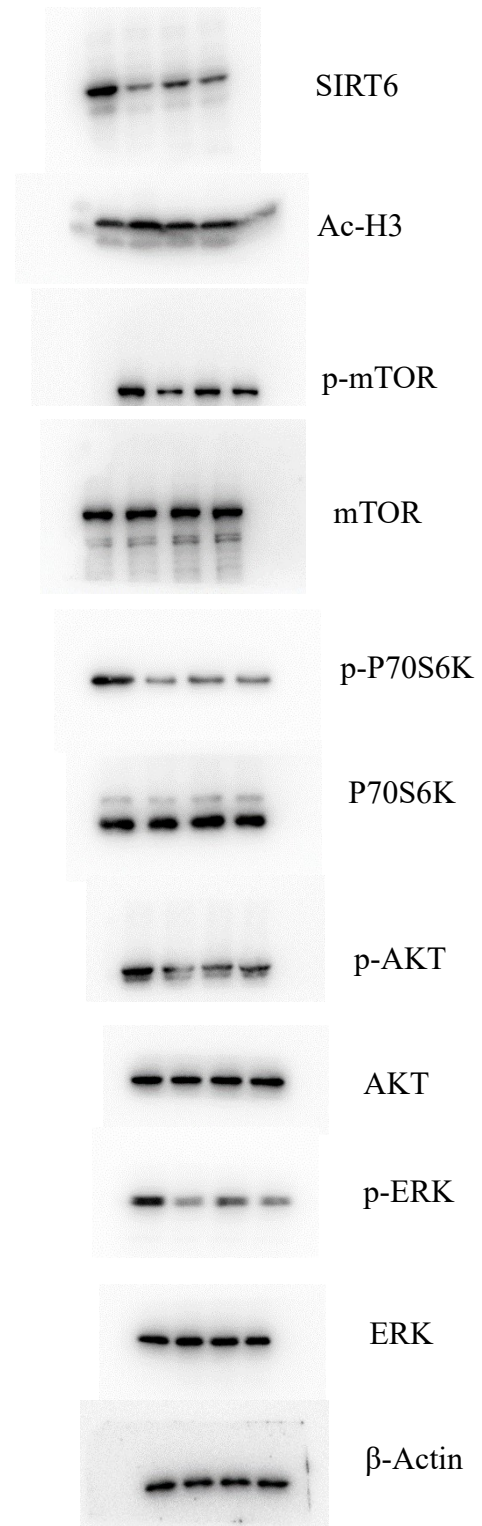

## 10. Figure S4

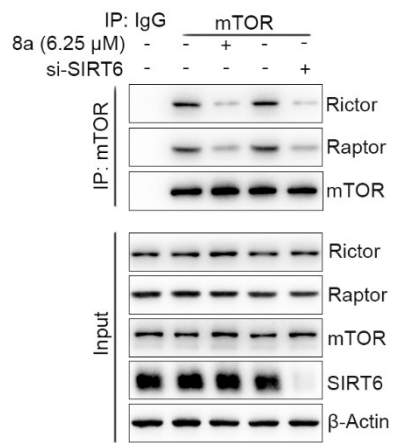

IP

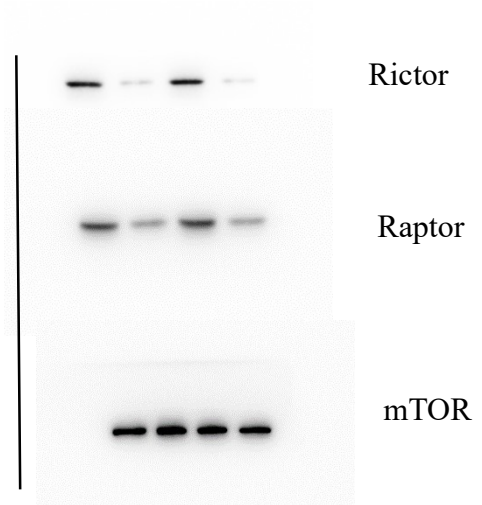

Input

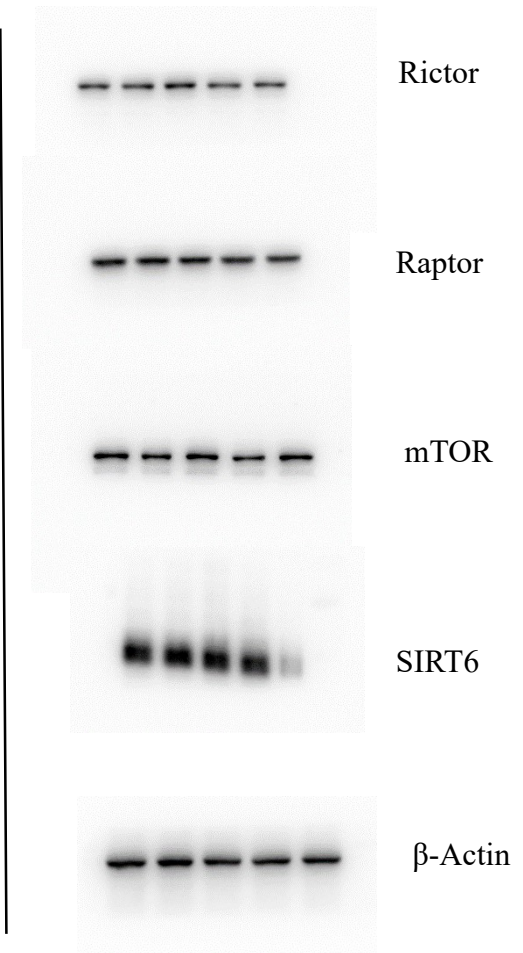

## 11. Figure S5

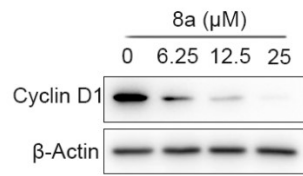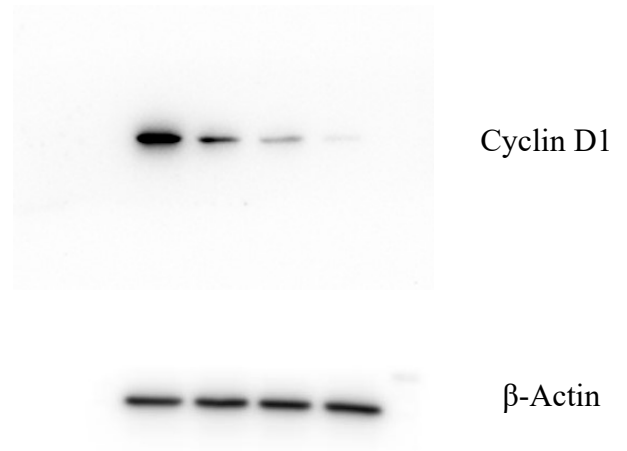

## 12. Figure S6

|                   |                                                                                   |                                                                                   |                                                                                   |                                                                                   |
|-------------------|-----------------------------------------------------------------------------------|-----------------------------------------------------------------------------------|-----------------------------------------------------------------------------------|-----------------------------------------------------------------------------------|
| GEM (10 nM)       | -                                                                                 | -                                                                                 | +                                                                                 | +                                                                                 |
| 8a (6.25 $\mu$ M) | -                                                                                 | +                                                                                 | -                                                                                 | +                                                                                 |
| Cyclin D1         |  |  |  |  |
| $\beta$ -Actin    |  |  |  |  |

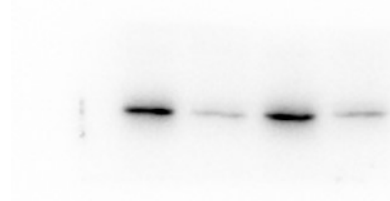

Cyclin D1

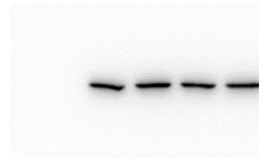

$\beta$ -Actin

### 13. Figure S7

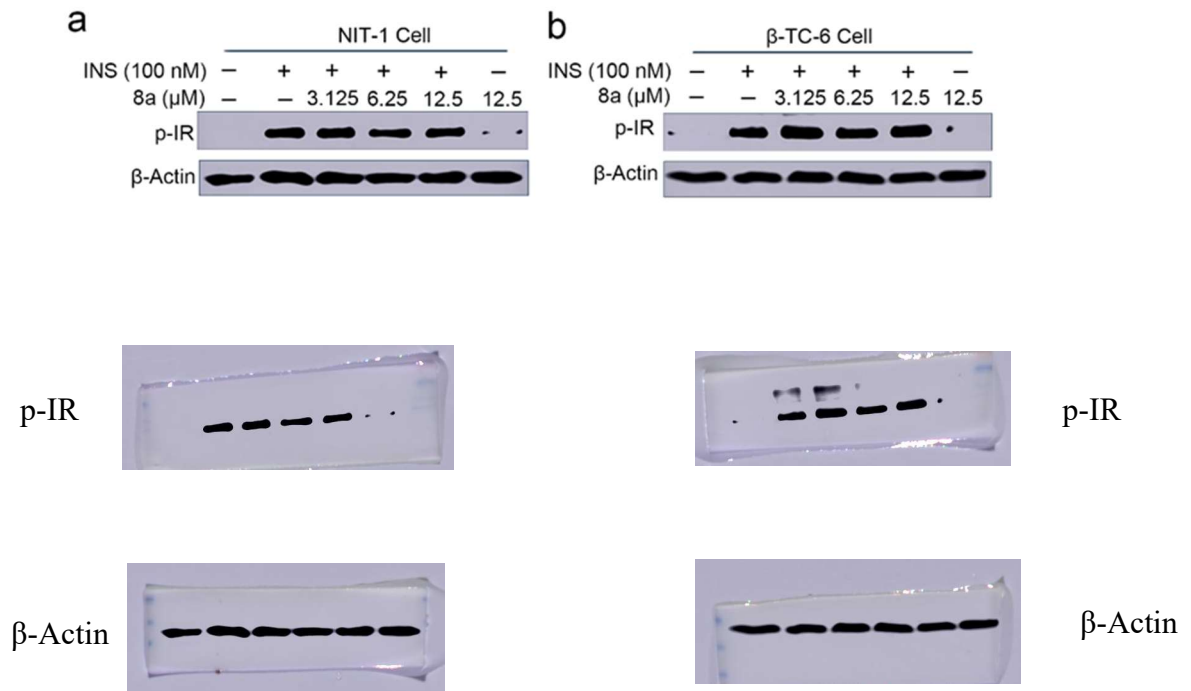

Supplement: 41419_2023_6018_MOESM2_ESM.pdf [file 41419_2023_6018_MOESM2_ESM.pdf]
